# Supplementary material for: High B7-H3 expression with low PD-L1 expression identifies armored-cold tumors in triple-negative breast cancer
Source: PubMed Central journal article supplement (PMC10821876; doi:10.1038/s41523-024-00618-6), 2024-01-27
Supplement: 41523_2024_618_MOESM1_ESM.pdf [file 41523_2024_618_MOESM1_ESM.pdf]

## Supplementary files

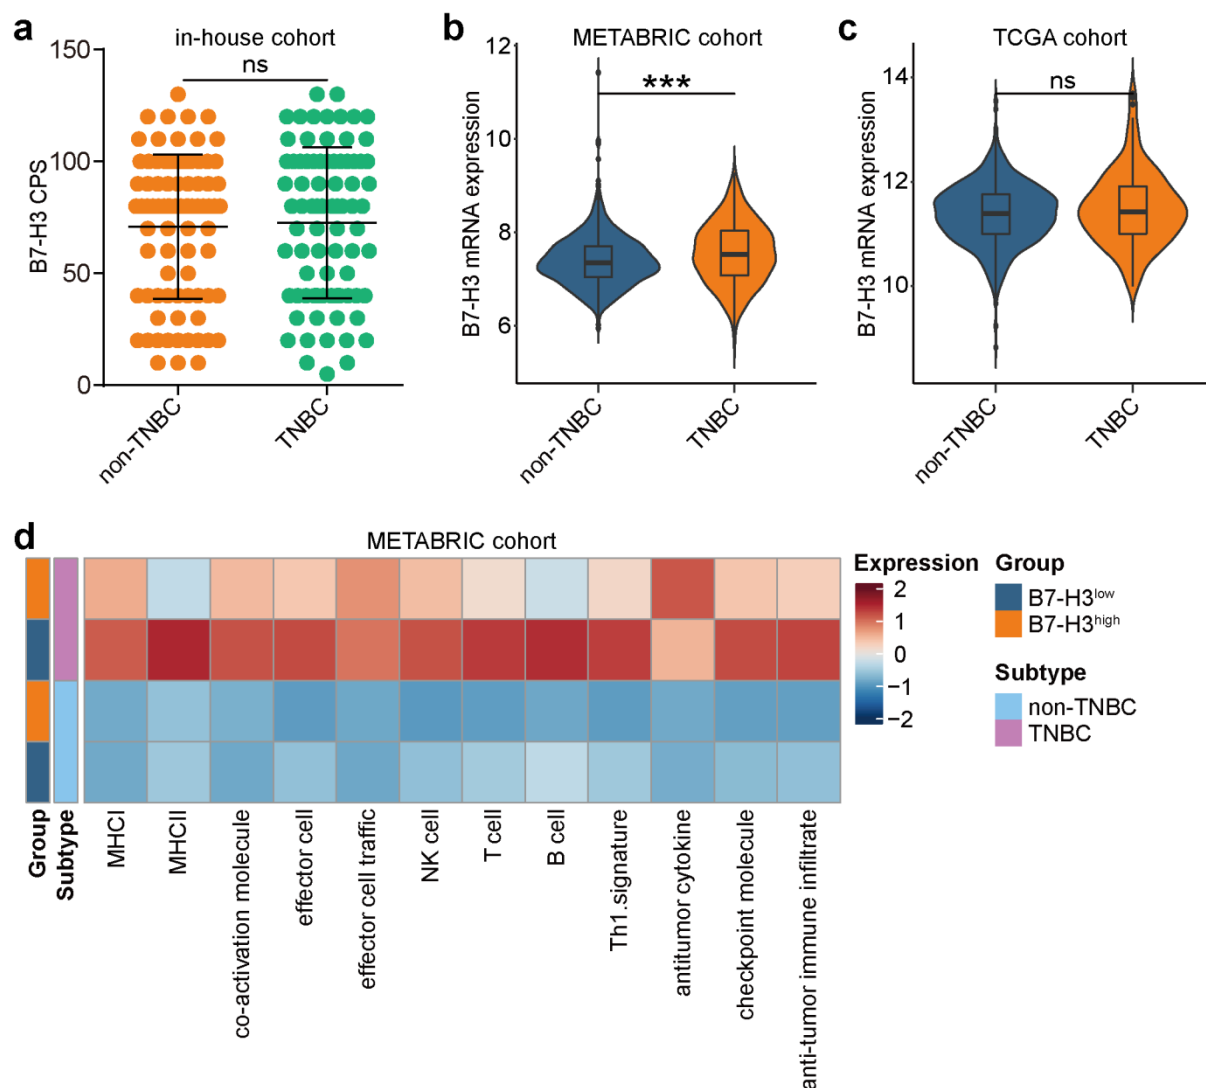

**Supplementary Figure 1. Expression of B7-H3 in TNBC and non-TNBC samples.** (a-c) B7-H3 expression in TNBC and non-TNBC samples. a: The in-house cohort, Data presented as mean  $\pm$  SD. b: The TCGA cohort. c: The METABRIC cohort. Significance was calculated with Student's t test. (d) Anti-tumor immune infiltration levels in non-TNBC and TNBC samples with the low and high B7-H3 expression in the METABRIC cohort.

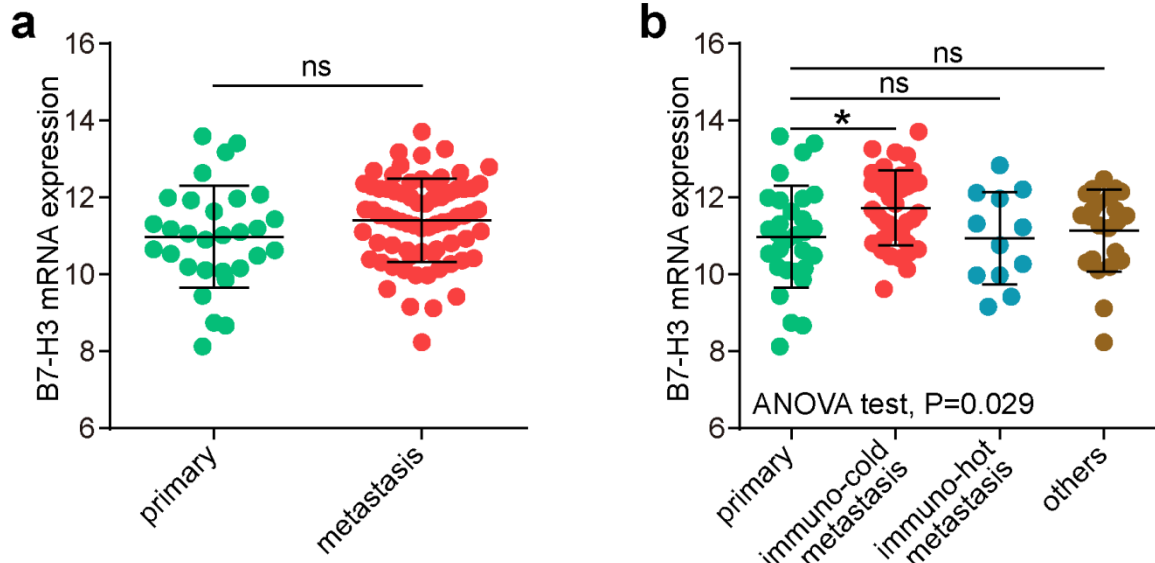

**Supplementary Figure 2. Expression of B7-H3 in primary and metastatic TNBC tissues.** (a) Expression of B7-H3 in primary and metastatic tissues at all organs. Data presented as mean  $\pm$  SD. Significance was calculated with Student's t test. (b) Expression of B7-H3 in primary and immuno-hot metastasis, immuno-cold metastasis, and other metastasis. Data presented as mean  $\pm$  SD. Significance was calculated with 1-way ANOVA with Tukey's multiple-comparison test.

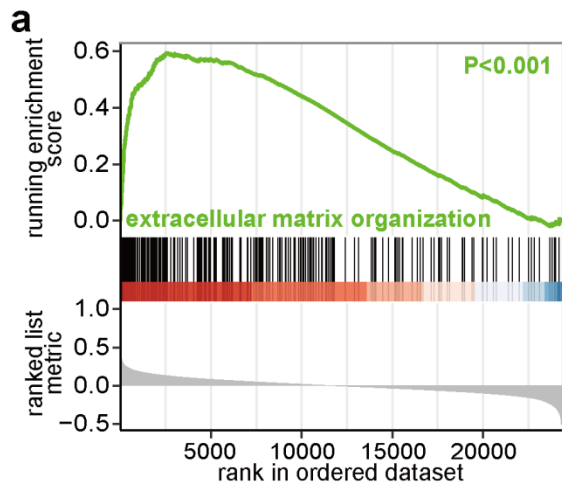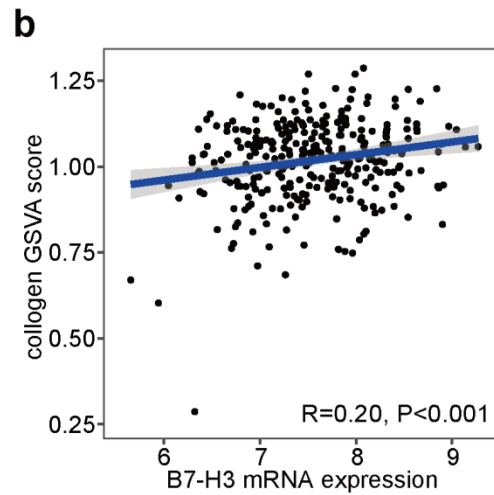

**Supplementary Figure 3. Correlation between B7-H3 and collagen deposition in the METABRIC cohort.** (a) GSEA revealing the association between B7-H3 and extracellular matrix organization. (b) Correlation between B7-H3 and collagen gene expression & collagen GSVA score. Significance was calculated with Pearson test.

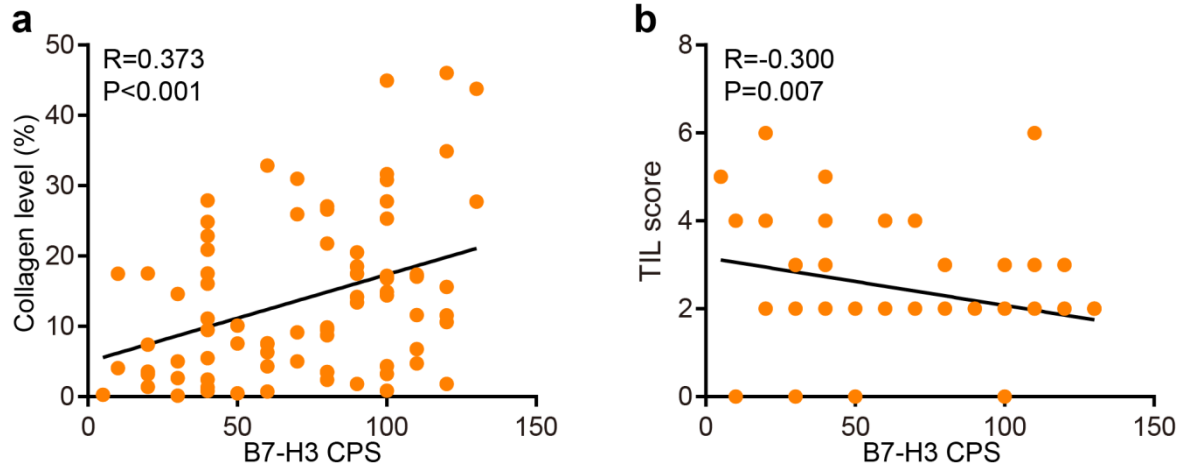

**Supplementary Figure 4. Correlation between B7-H3 expression and collagen level & TIL score in TNBC.** (a) Positive correlation between B7-H3 expression and collagen levels. Significance was calculated with Pearson test. (b) Negative correlation between B7-H3 expression and immune cells infiltration. Significance was calculated with Spearman test.



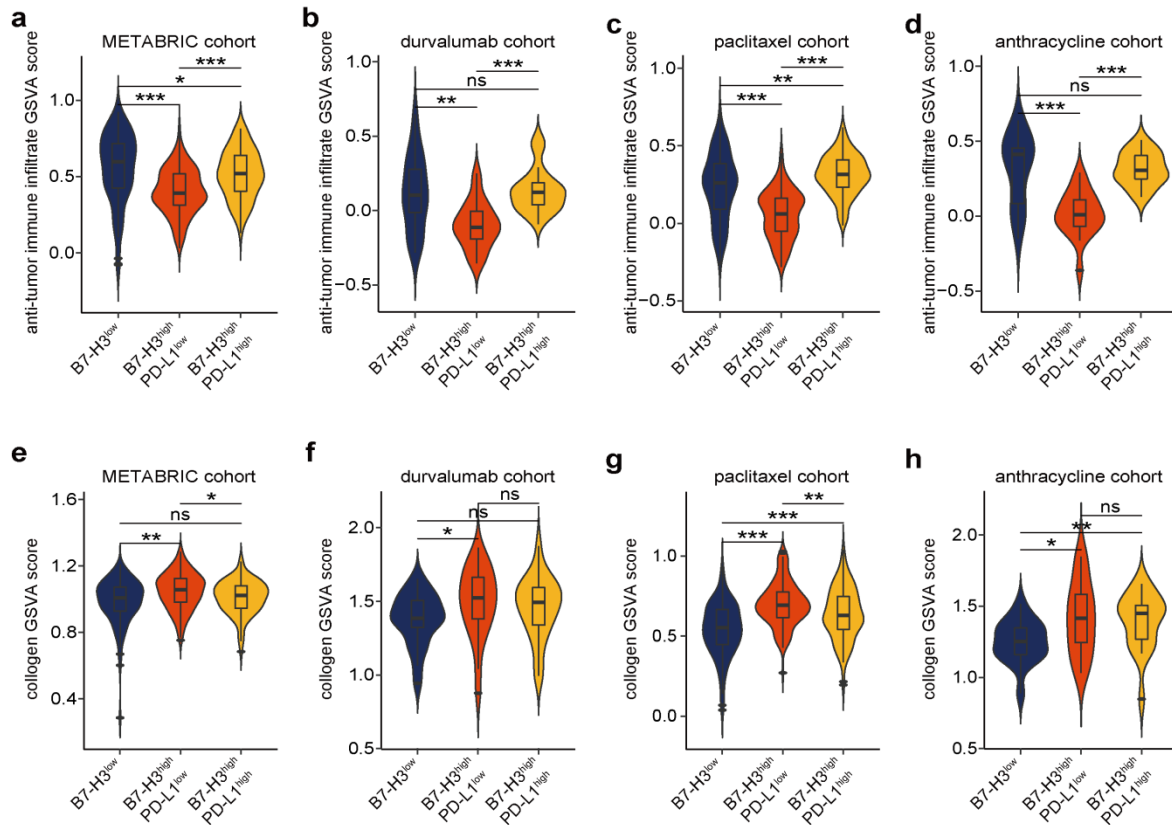

**Supplementary Figure 6. TIME features of three subtypes in four different cohorts.** (a-d) Violin plot showing the difference in anti-tumor immune infiltration in TNBC samples in the B7-H3<sup>low</sup>, the B7-H3<sup>high</sup>&PD-L1<sup>low</sup>, and the B7-H3<sup>high</sup>&PD-L1<sup>high</sup> subtypes in the METABRIC, durvalumab, the paclitaxel, and the anthracycline cohorts. Significance was calculated with 1-way ANOVA with Tukey's multiple-comparison test. (e-h) Difference of collagen infiltration in TNBC samples in the B7-H3<sup>low</sup>, the B7-H3<sup>high</sup>&PD-L1<sup>low</sup>, and the B7-H3<sup>high</sup>&PD-L1<sup>high</sup> subtypes in the METABRIC, the durvalumab, the paclitaxel, and the anthracycline cohorts. Significance was calculated with 1-way ANOVA with Tukey's multiple-comparison test.

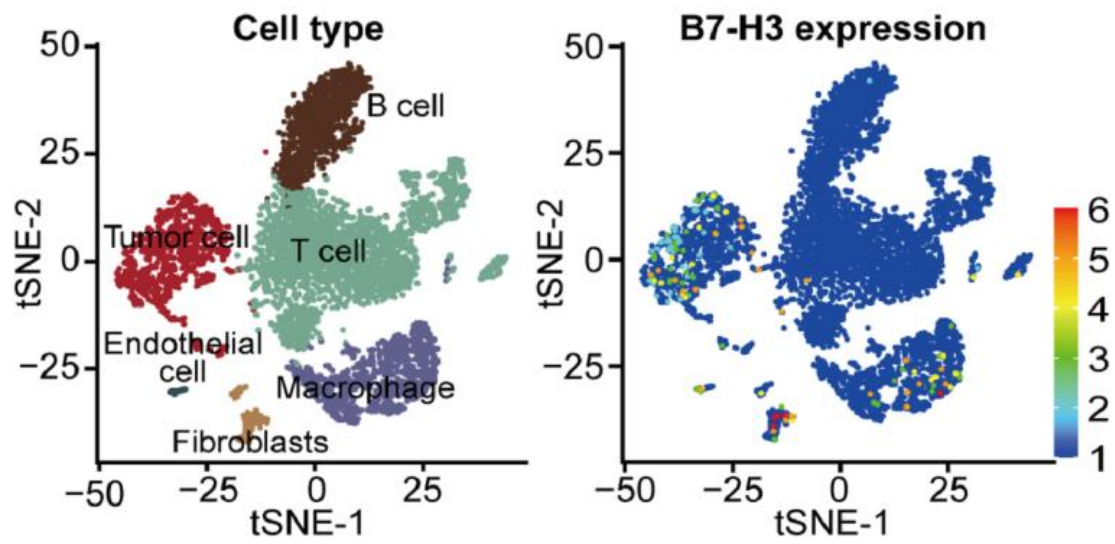

**Supplementary Figure 7.** t-SNE visualization of cell types in TNBC patients (the GSE180286 dataset) and B7-H3 expression.

**Supplementary Table 1.** Clinic-pathological parameters of patients in the recruited NAT cohort.

| Clinic-pathological parameters | Case | Proportion |
|--------------------------------|------|------------|
| Age                            |      |            |
| ≤60                            | 18   | 60.00%     |
| >60                            | 12   | 40.00%     |
| T stage                        |      |            |
| T2                             | 20   | 66.67%     |
| T3                             | 5    | 16.67%     |
| T4                             | 5    | 16.67%     |
| N stage                        |      |            |
| N0                             | 3    | 10.00%     |
| N1                             | 8    | 26.67%     |
| N2                             | 11   | 36.67%     |
| N3                             | 8    | 26.67%     |
| M stage                        |      |            |
| M0                             | 28   | 93.33%     |
| M1                             | 2    | 6.67%      |
| Miller-Payne grade             |      |            |
| 1                              | 1    | 3.33%      |
| 2                              | 5    | 16.67%     |
| 3                              | 8    | 26.67%     |
| 4                              | 5    | 16.67%     |
| 5                              | 9    | 30.00%     |
| unknown                        | 2    | 6.67%      |
| Ki-67 positive rate            |      |            |
| ≤60%                           | 14   | 46.67%     |
| >60%                           | 16   | 53.33%     |



**Supplementary Table 2.** Public and in-house cohorts included in the current research.

| <b>Cohort</b>   | <b>Case (TNBC case)</b> | <b>Source</b>                                                                                 |
|-----------------|-------------------------|-----------------------------------------------------------------------------------------------|
| Public cohort   |                         |                                                                                               |
| BC-METABRIC     | 1904 (298)              | <a href="http://www.cbioportal.org/">http://www.cbioportal.org/</a>                           |
| BC-TCGA         | 1104 (145)              | <a href="http://xenabrowser.net/datapages/">http://xenabrowser.net/datapages/</a>             |
| GSE173839       | 71 (21)                 | <a href="http://www.ncbi.nlm.nih.gov/geo/">http://www.ncbi.nlm.nih.gov/geo/</a>               |
| PRJNA558949     | 50 TNBC                 | <a href="http://www.ncbi.nlm.nih.gov/bioproject/">http://www.ncbi.nlm.nih.gov/bioproject/</a> |
| GSE194040       | 988 (362)               | <a href="http://www.ncbi.nlm.nih.gov/geo/">http://www.ncbi.nlm.nih.gov/geo/</a>               |
| GSE34138        | 178 (55)                | <a href="http://www.ncbi.nlm.nih.gov/geo/">http://www.ncbi.nlm.nih.gov/geo/</a>               |
| GSE168846       | 21 mouse tumors         | <a href="http://www.ncbi.nlm.nih.gov/geo/">http://www.ncbi.nlm.nih.gov/geo/</a>               |
| GSE209998       | 30 primary              |                                                                                               |
| GSE193103       | 72 metastasis           | <a href="http://www.ncbi.nlm.nih.gov/geo/">http://www.ncbi.nlm.nih.gov/geo/</a>               |
| GSE147322       |                         |                                                                                               |
| In-house cohort |                         |                                                                                               |
| HBreD090Bc01    | 80 TNBC                 | Outdo BioTech                                                                                 |
| HBreD090Bc03    | 83 non-TNBC             | Outdo BioTech                                                                                 |
| NAT cohort      | 30 TNBC                 | recruitment from multi-center                                                                 |
